# Supplementary material for: One step preparation of porous polyurea by reaction of toluene diisocyanate with water and its characterization
Source: Royal Society of Chemistry journal article supplement (doi:10.1039/c4ra06383j), 2014-01-01
Supplement: c4ra06383j1.pdf [file c4ra06383j1.pdf]

## Support Information

### 1. SEM pictures of PPU prepared with different TDI feeding rate

In this set of polymerization, PPU was prepared with different TDI feeding rate, varied from  $10 \text{ mL}\cdot\text{h}^{-1}$  to  $30 \text{ mL}\cdot\text{h}^{-1}$ . All polymerization was carried out at  $30 \text{ }^\circ\text{C}$ , with stirring rate of  $300 \text{ r min}^{-1}$ , total TDI of 10 wt% and in the solvent of  $\text{H}_2\text{O}/\text{acetone}$  mass ratio at 3/7. SEM photos of the corresponding samples are given here below in Fig. S1.

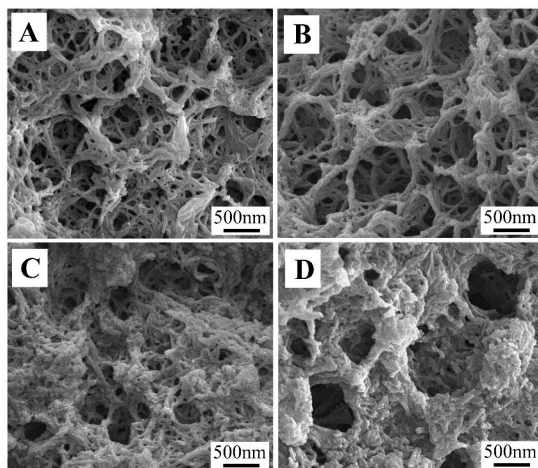

**Fig. S1** SEM photos of PPU prepared with varied TDI feeding rate (A,  $10 \text{ mL}\cdot\text{h}^{-1}$ ; B,  $20 \text{ mL}\cdot\text{h}^{-1}$ ; C,  $30 \text{ mL}\cdot\text{h}^{-1}$ ; D, One shot)

### 2. Pore size and distribution of PPU prepared at different polymerization temperature

To study the influence of polymerization temperature on the porous properties of PPU, a set of polymerization was carried out at varied temperature from  $0 \text{ }^\circ\text{C}$  to  $50 \text{ }^\circ\text{C}$  while keeping the other experimental unchanged ( $10 \text{ wt}\%$  of TDI, feeding rate at  $20 \text{ mL}\cdot\text{h}^{-1}$  and  $\text{H}_2\text{O}/\text{acetone}$  mass ratio of 3/7 for the solvent). Pore size and distribution of PPU thus prepared are displayed here below in Fig. S2.

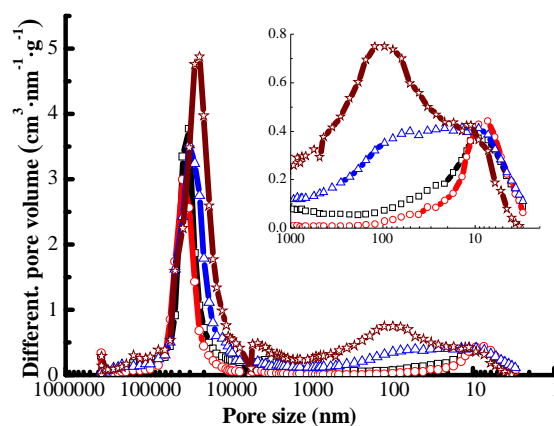

**Fig. S2** Pore size and size distribution of PPU prepared at different polymerization temperature ( $0 \text{ }^\circ\text{C}$ , ;  $20 \text{ }^\circ\text{C}$ , ;  $30 \text{ }^\circ\text{C}$ , ;  $50 \text{ }^\circ\text{C}$ , )
